# Supplementary material
Source: ML conference proceedings conference paper supplement (https://openreview.net/forum?id=xUXTbq6gWsB)
Supplement: supplementary_material [file attachment]

# Hosting, Maintenance and Licensing For NAS-Bench-360

## Hosting

- Hosting platform for datasets: **AWS S3**; hosting platform for code: **GitHub**
- AWS data bucket name: **pde-xd**; Github url: <https://github.com/rtu715/NAS-Bench-360>
- Dedicated website: <https://rtu715.github.io/NAS-Bench-360/>

We have already uploaded all datasets and relevant code to the aforementioned platforms. For users, access to data is not directly through the AWS interface but through our hosted GitHub page, where all the download links are available. In addition, executing our provided code automatically pulls the data from S3 to a local directory.

Soon, we are planning to host the datasets on CMU's shared google drive, as this would incur zero cost from storage and data downloads by users. This hosting platform will be permanent. Accordingly, we will also provide instructions on downloading from the new platform.

## Maintenance and Long-Term Preservation

We believe that these platforms are long-lasting, and would maintain service indefinitely. There is no cost from using GitHub. Once we migrate the dataset to the shared drive, data preservation is also cost-free as it is sponsored by CMU.

This will be available at the following URL:

<https://drive.google.com/drive/folders/1OOp6UrCiP79mTlkCrUdjjHWD08K0bJUw?usp=sharing>

## Licensing

We have chosen the [CC BY-SA](https://creativecommons.org/licenses/by-sa/4.0/) license for our generated dataset, Spherical CIFAR-100.
